# Supplementary material for: Attenuated Phenotype and Immunogenic Characteristics of a Mutated Herpes Simplex Virus 1 Strain in the Rhesus Macaque
Source: Viruses. 2018 May 2;10(5):234. doi: 10.3390/v10050234 (PMC5977227; doi:10.3390/v10050234)
Supplement: Supplementary file 1 [file viruses-10-00234-s001.pdf]

**Table S1** Clinical observations of macaques inoculated with the M3 (high and low dose) and PBS groups

| Group               | Macaque No. | Diet   | Oral vesicle | General symptoms | Viremia | Virus shedding* |
|---------------------|-------------|--------|--------------|------------------|---------|-----------------|
| <b>M3 high-dose</b> | #16209      | normal | -            | -                | -       | -               |
|                     | #16065      | normal | -            | -                | -       | -               |
|                     | #16061      | normal | -            | -                | -       | -               |
|                     | #16137      | normal | -            | -                | -       | -               |
| <b>M3 low-dose</b>  | #16149      | normal | -            | -                | -       | -               |
|                     | #16175      | normal | -            | -                | -       | -               |
|                     | #16319      | normal | -            | -                | -       | -               |
| <b>PBS control</b>  | #16173      | normal | -            | -                | -       | -               |
|                     | #16153      | normal | -            | -                | -       | -               |
|                     | #16379      | normal | -            | -                | -       | -               |

“-”: indicates that none of the above symptoms occurred

“\*”: virus shedding samples from the mouth, nose, eye, feces and urine.

**Table S2** Histopathological detection of various tissues in the high-dose group

| Tissue               | #16209 | #16065 | #16061 | #16137 |
|----------------------|--------|--------|--------|--------|
| <b>TG</b>            | -      | -      | -      | -      |
| <b>Spinal cord</b>   | -      | -      | -      | -      |
| <b>Mesencephalon</b> | -      | -      | -      | -      |
| <b>Pons varolii</b>  | -      | -      | -      | -      |
| <b>Cerebellum</b>    | -      | -      | -      | -      |
| <b>Thalamus</b>      | -      | -      | -      | -      |
| <b>Cerebrum</b>      | -      | -      | -      | -      |
| <b>Heart</b>         | -      | -      | -      | -      |
| <b>Liver</b>         | -      | -      | -      | -      |
| <b>Spleen</b>        | -      | -      | -      | -      |
| <b>Lung</b>          | -      | -      | -      | -      |

**Table S3** Histopathological detection in tissues in the M3 low-dose and PBS control groups

| Tissue        | M3 low-dose |        |        | PBS Control |        |        |
|---------------|-------------|--------|--------|-------------|--------|--------|
|               | #16173      | #16153 | #16379 | #16149      | #16175 | #16319 |
| Spinal cord   | -           | -      | -      | +++         | ++     | ++     |
| Optic nerve   | -           | -      | -      | ++          | +      | +      |
| Mesencephalon | -           | -      | +      | ++          | +      | +      |
| Pons varolii  | -           | +      | -      | +           | +      | +      |
| Thalamus      | -           | -      | -      | +           | ++     | ++     |
| Heart         | -           | -      | -      | ++          | -      | +      |
| Liver         | -           | -      | -      | ++          | +      | -      |
| Spleen        | -           | -      | -      | +           | ++     | -      |
| Lung          | +           | -      | -      | ++          | ++     | +      |

“-”: negative.

“+”: Slight inflammatory cells infiltration without neural damage.

“++”: Slight inflammatory cell infiltration with neural damage.

“+++”: Aggravated inflammatory with neural damage.

#### Supplementary figure legends

**Figure S1** Pathological features M3 low-dose- and PBS-inoculated macaques challenged with wild-type 17<sup>+</sup> strains.

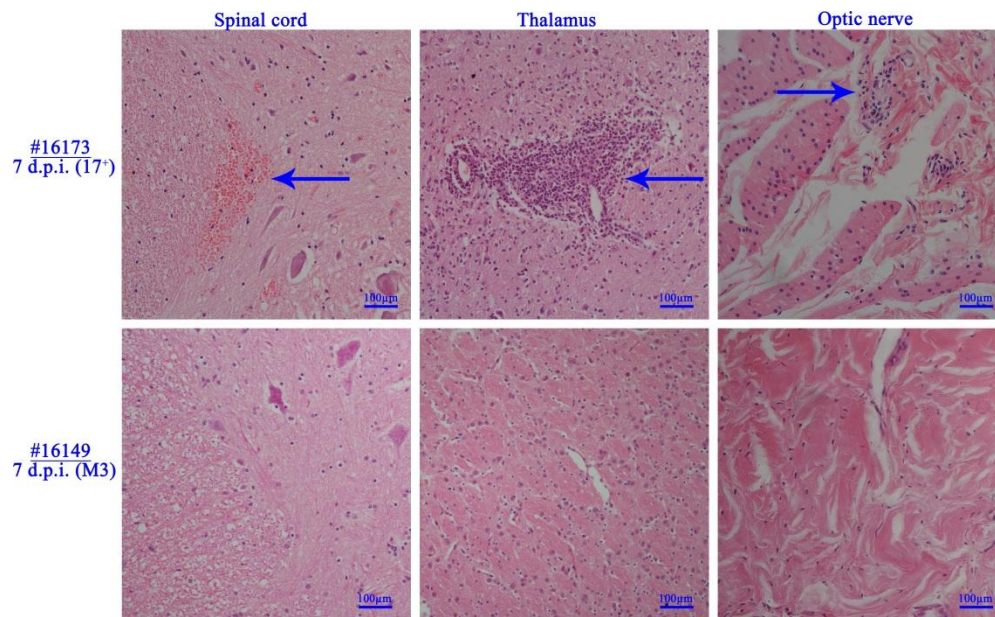

Histopathological detection of spinal cord, thalamus and optic nerve of M3 low-dose macaque(#16149) and PBS control macaques (#16173) , positive pathological change are indicated by arrows, scale bars=100  $\mu\text{m}$ .
